# Supplementary material
Source: PubMed Central journal article supplement (PMC5326612)

Supplemental Figure 3: Testing Pathway Schematic

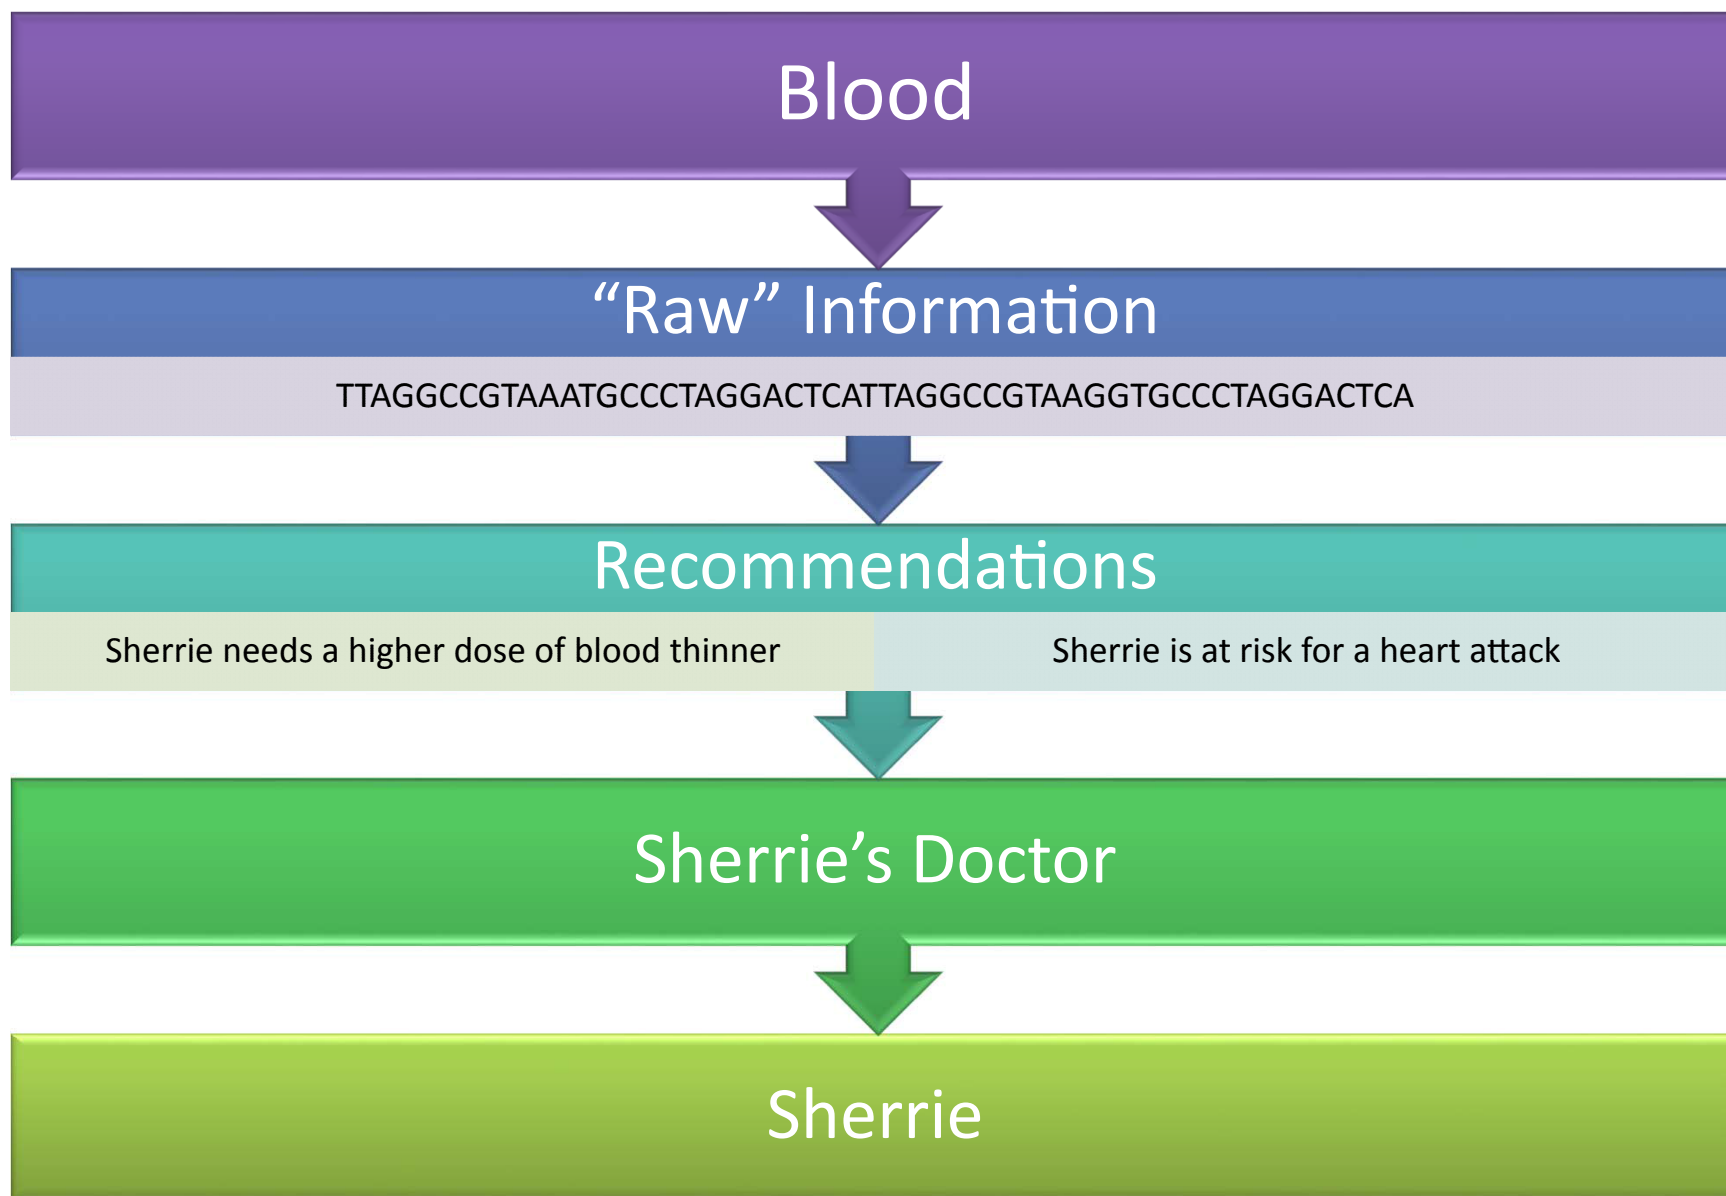

Supplement: NIHMS802547-supplement-Supplementary_Figure_3.pdf [file NIHMS802547-supplement-Supplementary_Figure_3.pdf]
